## CORRECTION

# Correction: Effects of psychogenic stress on oxidative stress and antioxidant capacity at different growth stages of rats: Experimental study

The *PLOS ONE* Staff

## Notice of Republication

This article was republished on April 23, 2024, to correct its type. It was erroneously published as a registered report protocol instead of a research article. The publisher apologizes for this error. Please download this article again to view the correct version. Both the originally published, uncorrected article and the republished, corrected article are provided here for reference.

## Supporting information

**S1 File. Originally published, uncorrected article.**  
(PDF)

**S2 File. Republished, corrected article.**  
(PDF)

## Reference

1. Lee S, Itagaki A, Satoh A, Sugimoto I, Saito T, Shibukawa Y, et al. (2024) Effects of psychogenic stress on oxidative stress and antioxidant capacity at different growth stages of rats: Experimental study. *PLoS ONE* 19(4): e0287421. <https://doi.org/10.1371/journal.pone.0287421>. PMID: 38653001

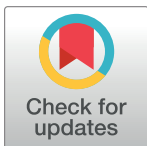

## OPEN ACCESS

**Citation:** The *PLOS ONE* Staff (2024) Correction: Effects of psychogenic stress on oxidative stress and antioxidant capacity at different growth stages of rats: Experimental study. *PLoS ONE* 19(7): e0306774. <https://doi.org/10.1371/journal.pone.0306774>

**Published:** July 5, 2024

**Copyright:** © 2024 The PLOS ONE Staff. This is an open access article distributed under the terms of the [Creative Commons Attribution License](https://creativecommons.org/licenses/by/4.0/), which permits unrestricted use, distribution, and reproduction in any medium, provided the original author and source are credited.
